# Supplementary material for: Artificial neural networks for quantitative online NMR spectroscopy
Source: PubMed Central journal article supplement (PMC7320049; doi:10.1007/s00216-020-02687-5), 2020-05-09
Supplement: 216_2020_2687_MOESM1_ESM.pdf [file 216_2020_2687_MOESM1_ESM.pdf]

**Analytical and Bioanalytical Chemistry**

**Electronic Supplementary Material**

**Artificial neural networks for quantitative online NMR spectroscopy**

Simon Kern, Sascha Liehr, Lukas Wander, Martin Bornemann-Pfeiffer, Simon Müller,  
Michael Maiwald, Stefan Kowarik

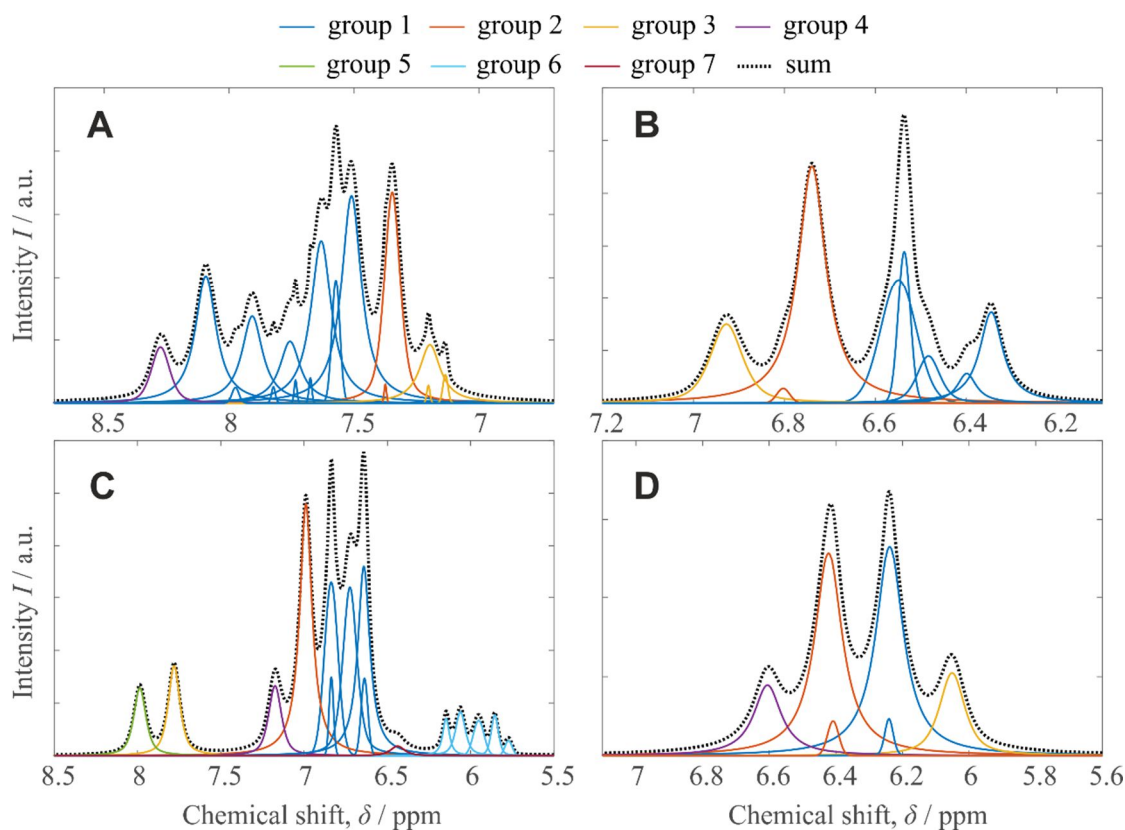

**Fig. S1** Visualization of the peak groups for the pure component models which were created in PEAXACT 4 and grouped automatically using MATLAB. A: *o*-FNB; B: Li-toluidine; C: Li-MNDPA; and D: toluidine.

For further information see also Ref. [5] and [8]:

[5] Kern S, Wander L, Meyer K, Guhl S, Mikkola ARG, Holtkamp M, et al. Flexible automation with compact NMR spectroscopy for continuous production of pharmaceuticals. *Anal Bioanal Chem.* 2019; 411: 3037–3046.

[8] Kern S, Meyer K, Guhl S, Gräßer P, Paul A, King R, et al. Online low-field NMR spectroscopy for process control of an industrial lithiation reaction—automated data analysis. *Anal Bioanal Chem.* 2018; 410: 3349–3360.
